# Supplementary material
Source: HighWire-hosted journal article supplement (https://svn.bmj.com/content/svn-2023-002779)
Supplement: inline-supplementary-material-1 [file inline-supplementary-material-1.pdf]

Supplementary Table 1. Distribution of vascular territories and location of infarcts among PCS.

| Vascular territory | N (%)     | Location of infarcts | N (%)     |
|--------------------|-----------|----------------------|-----------|
| PICA               | 31(59.6)  | Cerebellum           | 37(71.2)  |
| AICA               | 11(21.2)  | Medulla              | 5(9.6)    |
| SCA                | 3(5.8)    | Pons                 | 1(1.9)    |
| BA                 | 1(1.9)    | Cerebellum+ medulla  | 4(7.7)    |
| Multi-territory    | 6(11.5)   | Cerebellum+ pons     | 4(7.7)    |
| AICA+SCA           | 2(3.8)    | Medulla+ pons        | 1(1.9)    |
| PICA+SCA           | 2(3.8)    |                      |           |
| AICA+SCA+PICA      | 2(3.8)    |                      |           |
| Total              | 52(100.0) |                      | 52(100.0) |

Abbreviations: PCS, posterior circulation stroke; PICA, posterior inferior cerebellar artery; AICA, anterior inferior cerebellar artery; SCA, superior cerebellar artery; BA, basilar artery;
