# Supplementary material
Source: HighWire-hosted journal article supplement (https://svn.bmj.com/content/svn-2023-002779)
Supplement: inline-supplementary-material-2 [file inline-supplementary-material-2.pdf]

Supplementary Table 2. Sensitivity and specificity of ABCD<sup>2</sup> score and its combination with truncal ataxia in the differentiation of PCS with VN by age group.

| Age, years | ABCD <sup>2</sup> ≥ 4      |                            | ABCD <sup>2</sup> ≥ 4<br>plus truncal ataxia (2&3) |                            |
|------------|----------------------------|----------------------------|----------------------------------------------------|----------------------------|
|            | Sensitivity, %<br>(95% CI) | Specificity, %<br>(95% CI) | Sensitivity, %<br>(95% CI)                         | Specificity, %<br>(95% CI) |
| 18-39      | 28.6(5.1, 69.7)            | 100.0(80.8, 100.0)         | 85.7(42.0, 99.2)                                   | 90.5(68.2, 98.3)           |
| 40-59      | 50.0(26.8, 73.2)           | 87.1(69.2, 95.8)           | 88.9(63.9, 98.1)                                   | 87.1(69.2, 95.8)           |
| ≥60        | 92.6(74.2, 98.7)           | 58.8(33.5, 80.6)           | 100.0(84.5, 100.0)                                 | 58.8(33.5, 80.6)           |

Abbreviations: VN, vestibular neuritis; PCS, posterior circulation stroke.
